# Supplementary material for: Heat Shock Protein 90 Chaperones E1A Early Protein of Adenovirus 5 and Is Essential for Replication of the Virus
Source: PubMed Central journal article supplement (PMC7921956; doi:10.3390/ijms22042020), 2021-02-18
Supplement: ijms-22-02020-s001.pdf [file ijms-22-02020-s001.pdf]

## Supplementary Materials

### Supplementary Table 1

#### List of primers

#### Primers and probes for qPCR

Hexon-F: GGACGCCTCGGAGTACCTGAG

Hexon-R: ACAGTGGGGTTTCTGAACTTGTT

Hexon probe: CTGGTGCAGTTCGCCCGTGCC

DBP-F: TAATCAAGCATGGCAAAGGAG

DBP-R: 5'-AATTTCACTTTCCGCTTCG

DBP probe: TGCGGACGCAAGAGGAAGAG

E1A F: TTGTCATTATCACCGGAGGAA

E1A R: TCACCCACTGCCATAATTT

E1A probe: GGACCTGTGGCATGTTTGTCTACA

G6PD-F: TGAATGATGCAGCTCTGATCC

G6PD-R: CACGATGATGCGGTTCCA

G6PD probe: GTAACGCAGCTCCGGGCT

#### Primers for E1A gene cloning

E1A289-F: CGGCGGTACCATGAGACATATTATCTGCCACG

E1A289-R: GCGCCCTCGAGTGGCCTGGGGCGTTTACAG

#### Oligonucleotides for Hsp90 mutagenesis

HSP90 $\alpha$ E46A-F: GAGATTTTCCTTCGGGCGTTGATCTCTAATGCT

HSP90 $\alpha$ E46A-R: AGCATTAGAGATCAACGCCCGAAGGAAAATCTC
